# Supplementary material for: Prevalence of hepatitis C in the adult population of Bulgaria: a pilot study
Source: PubMed Central journal article supplement (PMC7341663; doi:10.1186/s13104-020-05158-3), 2020-07-07
Supplement: 13104_2020_5158_MOESM1_ESM.pdf [file 13104_2020_5158_MOESM1_ESM.pdf]

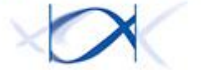

Remember to bring this invitation letter and a photo identification card for the appointment.

If you cannot participate, we will appreciate very much if you will call one of the numbers above and let us know and then you will not be contacted again.

The Survey team thanks you for your collaboration.

Sincerely,

---

Zhivko Todorov

Mayor of Stara Zagora
