# Supplementary material for: Prevalence of hepatitis C in the adult population of Bulgaria: a pilot study
Source: PubMed Central journal article supplement (PMC7341663; doi:10.1186/s13104-020-05158-3), 2020-07-07
Supplement: 13104_2020_5158_MOESM2_ESM.pdf [file 13104_2020_5158_MOESM2_ESM.pdf]

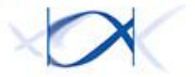

If you are unable to come to the Regional Health Inspectorate, there is an option of getting tested in a mobile unit which can come to your address. Please call 042 604151 or 042 602468 to learn more about this opportunity.

If you cannot participate, we will appreciate very much if you will call one of the numbers above and let us know and then you will not be contacted again.

Remember to bring this invitation letter and a photo identification card for the appointment.

The Survey team thanks you for your collaboration.

Sincerely,

---

Zhivko Todorov

Mayor of Stara Zagora
